# Supplementary material for: Physiological and Transcriptomic Analysis Provide Insight into Low Temperature Enhancing Hypericin Biosynthesis in Hypericum perforatum
Source: MDPI journal article supplement (doi:10.3390/molecules26082294), 2021-04-15
Supplement: s1 [file s1]

Supplementary Materials

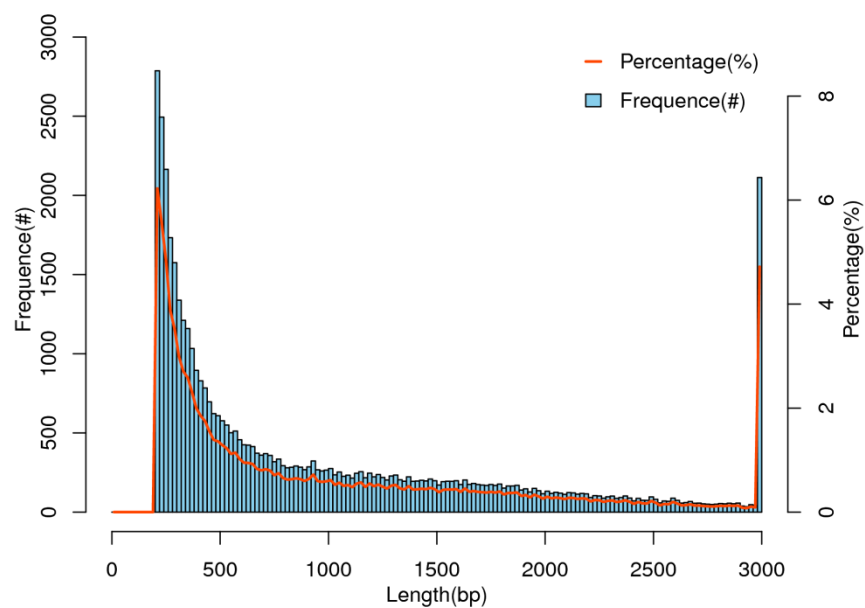

Figure S1: Length distribution of unigene.

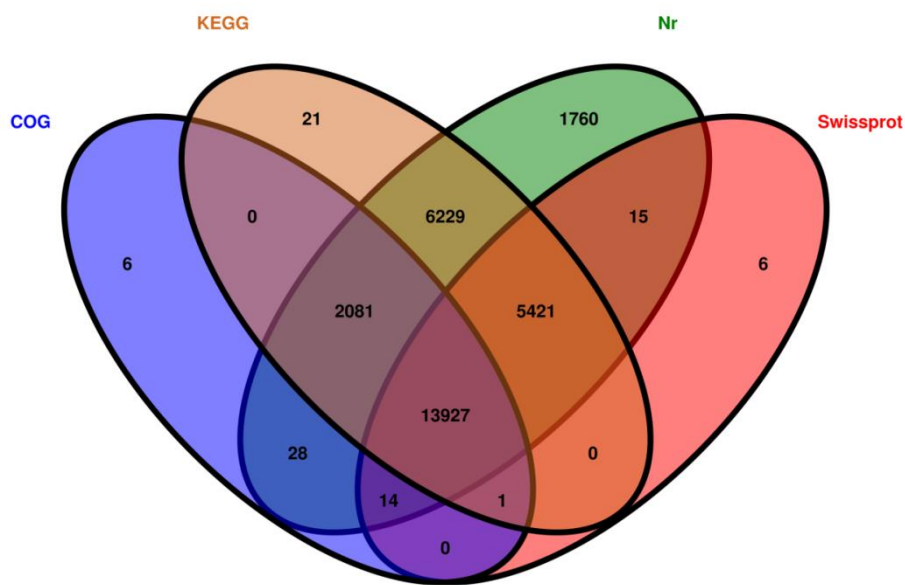

Figure S2: Basic annotation for all unigenes.

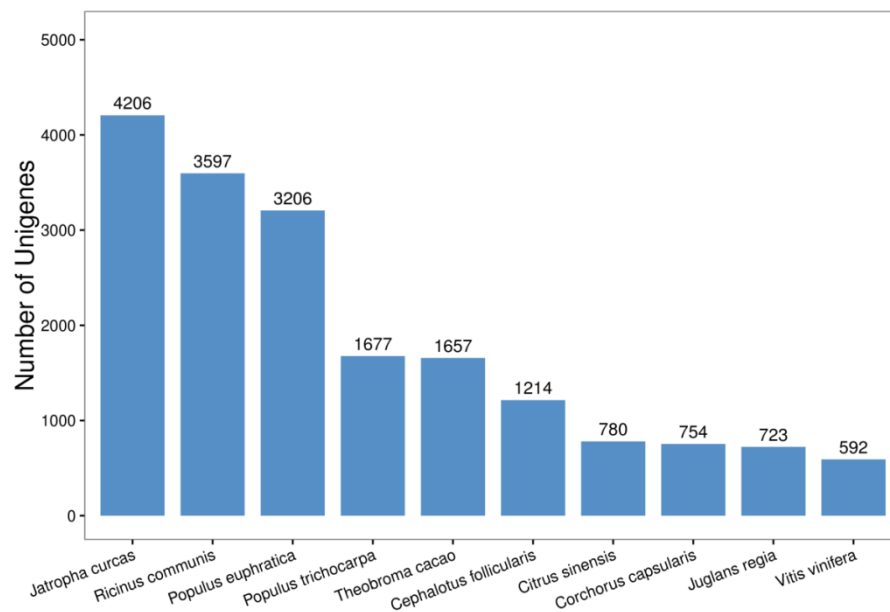

**Figure S3: Top 10 plant species distribution of the total homologous sequences.**

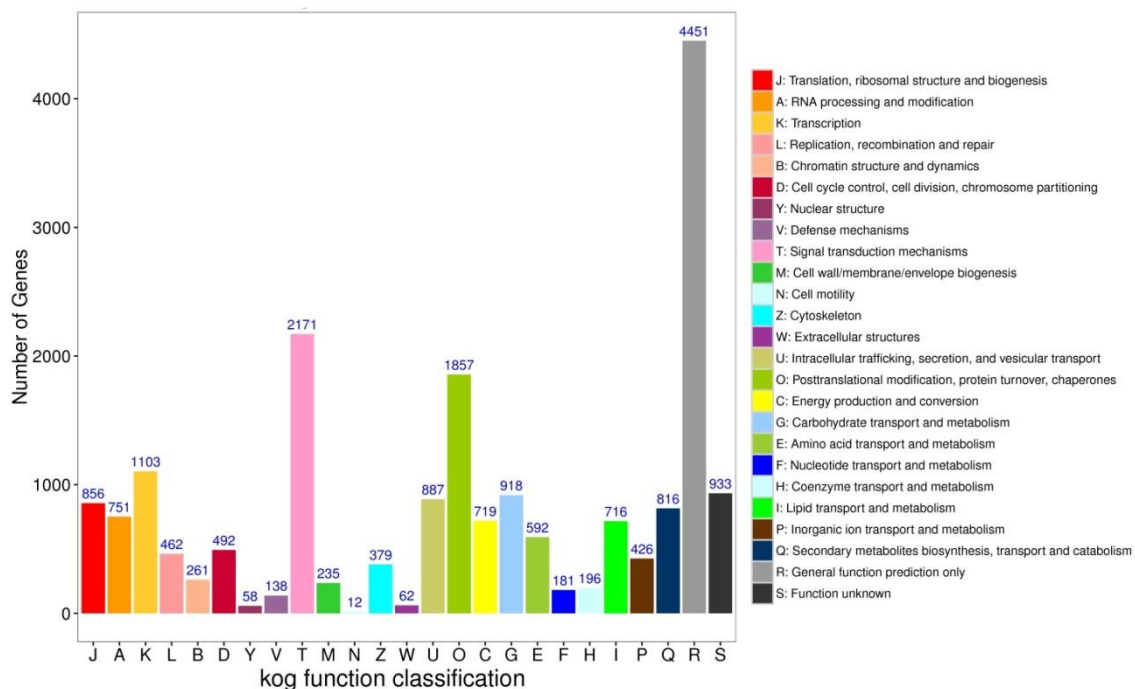

**Figure S4: Distribution of unigenes in the transcriptome with KOG functional classification.**

Sequences have a KOG classification among 25 categories. Note: [A] RNA processing and modification; [B] Chromatin structure and dynamics; [C] Energy production and conversion; [D] Cell cycle control, cell division, chromosome partitioning; [E] Amino acid transport and metabolism; [F] Nucleotide transport and metabolism; [G] Carbohydrate transport and metabolism; [H] Coenzyme transport and metabolism; [I] Lipid transport and metabolism; [J] Translation, ribosomal structure and biogenesis; [K] Transcription; [L] Replication, recombination and repair; [M] Cell wall/membrane/envelope biogenesis; [N] Cell motility; [O] Posttranslational modification, protein turnover, chaperones; [P] Inorganic ion transport and metabolism; [Q] Secondary metabolites biosynthesis, transport and catabolism; [R] General function

prediction only; [S] Function unknown; [T] Signal transduction mechanisms; [U] Intracellular trafficking, secretion, and vesicular transport; [V] Defense mechanisms; [W] Extracellular structures; [Y] Nuclear structure; [Z] Cytoskeleton.

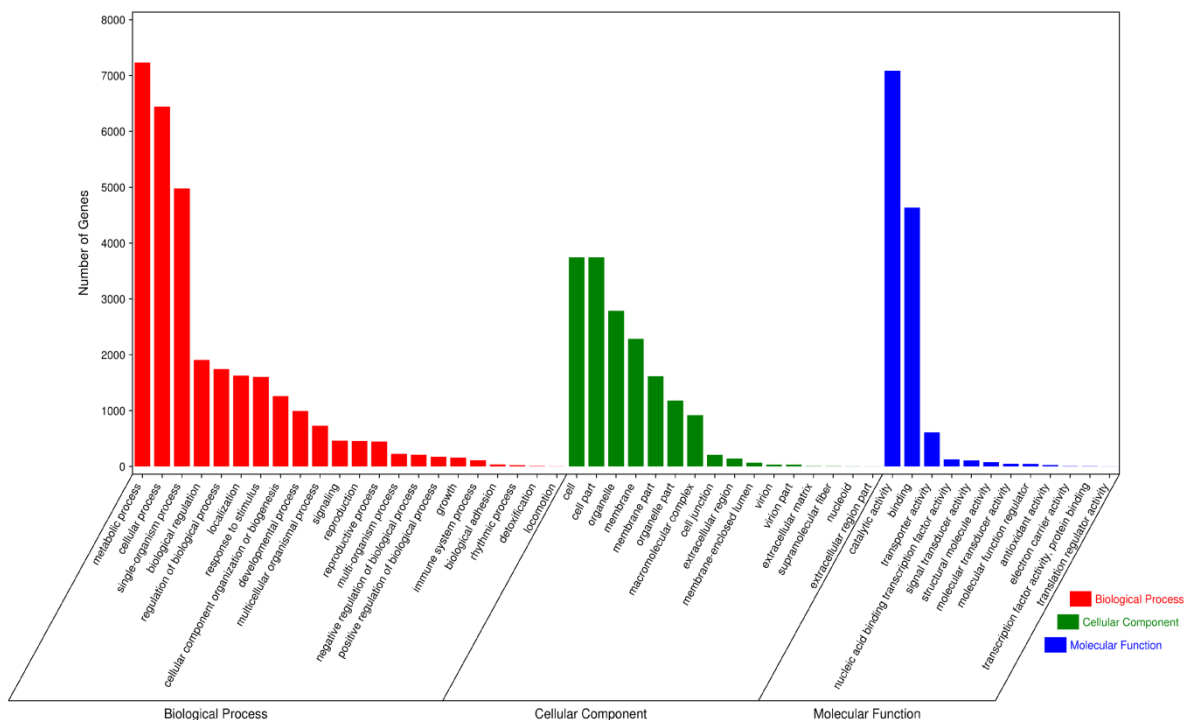

**Figure S5: Functional classifications of GO terms of all assembled unigenes.** Note: The results are summarized in three main categories: biological process, cellular component, and molecular function. The right y-axis indicates the number of genes in a category. The left y-axis indicates percentage of a specific category of genes.

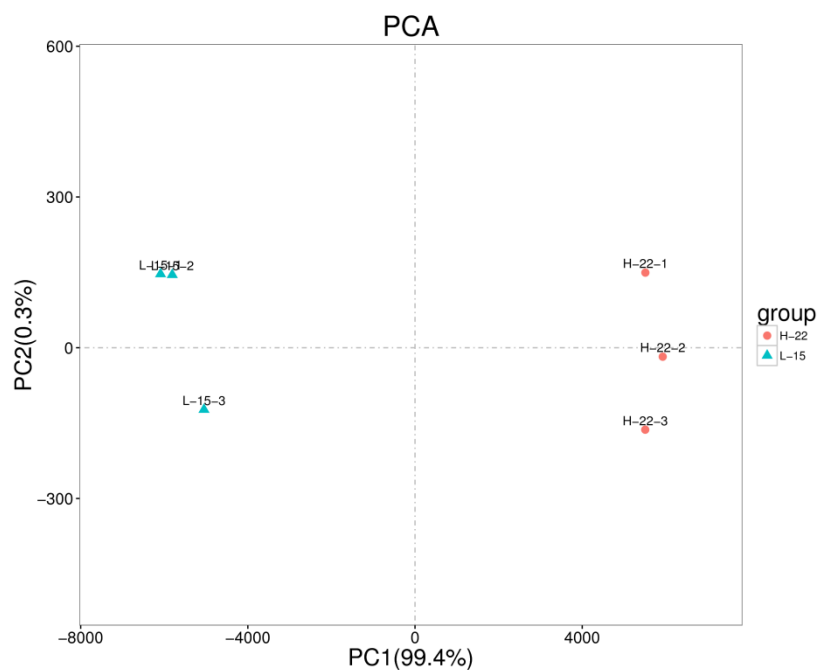

**Figure S6: The PCA analysis between 15 and 22°C samples.**

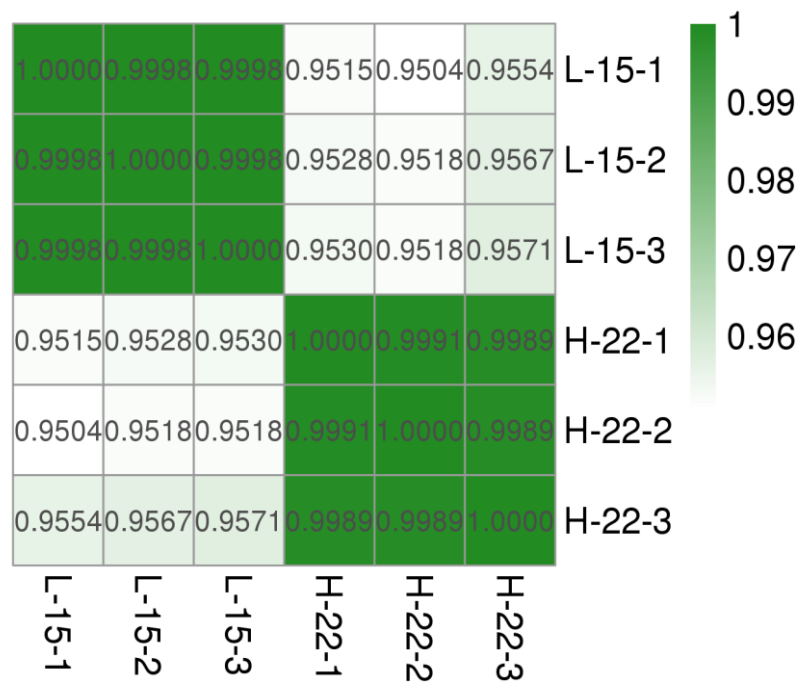

**Figure S7: The correlation analysis of heat map between 15 and 22°C samples.**

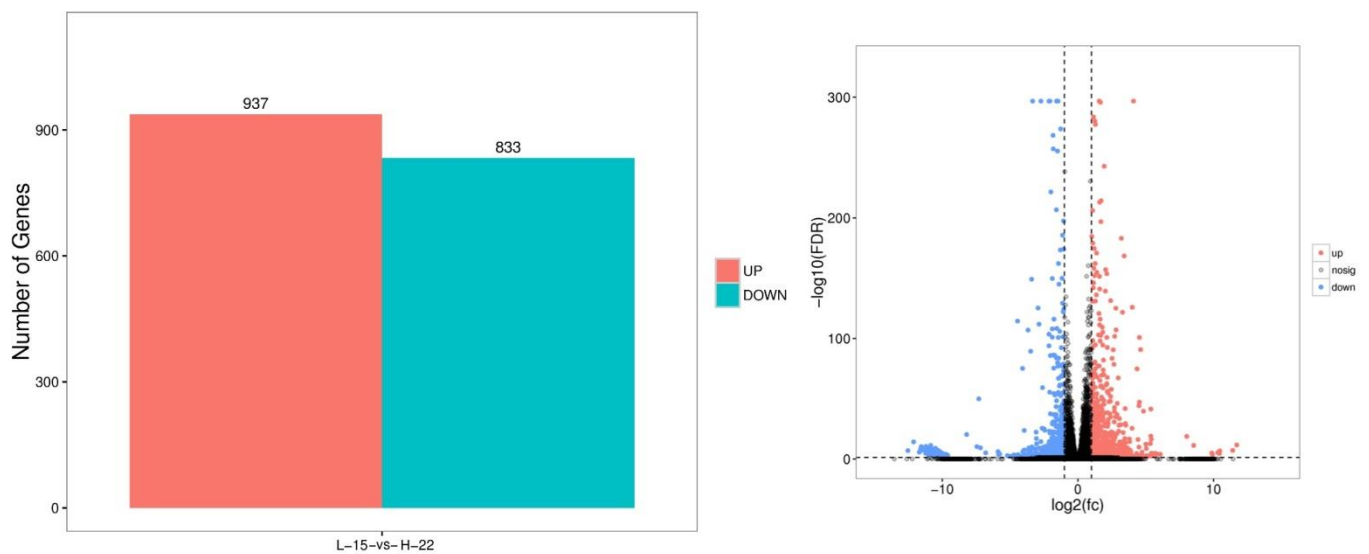

**Figure S8: Number of differentially expressed genes and volcano plot when plants grown at 15 °C versus 22°C.** Note: A total of 1,584 DEGs were obtained after excluding 186 repeated genes from the originally generated 1,770 genes.

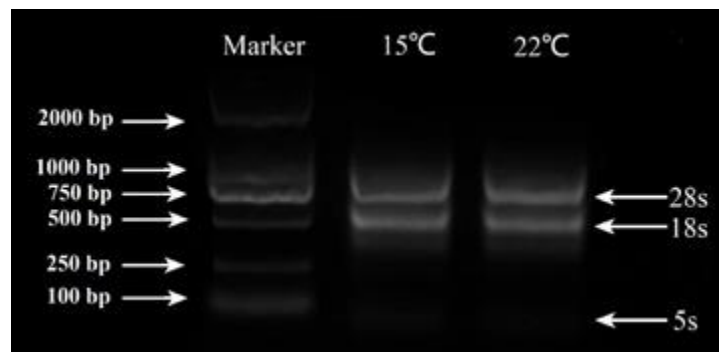

**Figure S9: The quality of total RNA at 15 and 22°C was evaluated by 1.0% agarose gel electrophoresis.**

**Table S1: Sequences of primer employed in qRT-PCR analysis**

| Gene name                                      | Primer sequences (5' to 3')                                     | Amplicon size (bp) |
|------------------------------------------------|-----------------------------------------------------------------|--------------------|
| <i>ACT</i>                                     | Forward: ATCTCCGTCTTGACCTTGC<br>Reverse: ACGATTTCCTGCTGT        | 104                |
| <b>Hyp biosynthesis (19)</b>                   |                                                                 |                    |
| Photosynthesis                                 |                                                                 |                    |
| <i>CAB</i>                                     | Forward: TACCCAGGAGGGAGCTTTGA<br>Reverse: ATGGCCTGCACGAAGAATCC  | 131                |
| <i>CAB1</i>                                    | Forward: GAATCTCGCCGACCACTC<br>Reverse: GGCAAACTAGCGAGGAAAAGT   | 100                |
| <i>CAB1B</i>                                   | Forward: GGGTCTCCATGAGGAAGGTC<br>Reverse: TGGGAATTCGCCAGTCAAGT  | 134                |
| <i>CAB3</i>                                    | Forward: AAGCCCAACTCCAGTTTCCTC<br>Reverse: TACTTGACACGCTCTGGGC  | 122                |
| <i>CAB3C</i>                                   | Forward: GGGTGCCCTTCAGGATGTAA<br>Reverse: CAGTGTCCTCAACCGTAGTCA | 188                |
| <i>CAB96</i>                                   | Forward: CTATTGGGAAACCCGAGCC<br>Reverse: GGTCTCCGGCAATTCTACAG   | 108                |
| Carbohydrate metabolism                        |                                                                 |                    |
| <i>BGLU11</i>                                  | Forward: GGCCTGATAATGCACCCCAT<br>Reverse: GCTTTGCTTCTGCTCTGTG   | 100                |
| <i>CA</i>                                      | Forward: ACCCCGAATGCGTGTTTATG<br>Reverse: ATATTCAACAGCGGACCCGA  | 106                |
| <i>CA1</i>                                     | Forward: GCGAAACAAACGAGCCTAA<br>Reverse: CAACAGCAGATCCAACCCCA   | 126                |
| <i>LDHA</i>                                    | Forward: TTATGGTGGTGTCGAACCCG<br>Reverse: AGAACCAGAACCTGGAGCTA  | 120                |
| <i>GAD</i>                                     | Forward: GAATACCATCTGCGTTGCGG<br>Reverse: GAGTGTCCTAGCCTGTGATT  | 116                |
| <i>GAPC</i>                                    | Forward: CTAGGGCTGTTGGGATGGTG<br>Reverse: CCGGTTGAGGTCAGGAAACA  | 104                |
| <i>PGAM</i>                                    | Forward: TGTGGAAGGCGAGAAGAACC<br>Reverse: CCAGCTCGGTCTGTCTGTTA  | 140                |
| fatty acids metabolism                         |                                                                 |                    |
| <i>BEAT</i>                                    | Forward: CCGCTAACCGGTCCATTAGG<br>Reverse: CGTTGCACGAACATCCATCC  | 109                |
| <i>BPS</i>                                     | Forward: ATCGGGGCAAACCCTAACAC<br>Reverse: ATCTCGTAGAAGTGGGCCGT  | 116                |
| <i>PED1</i>                                    | Forward: TGCCCTCAGAACAGTCAAC<br>Reverse: CGCCAATGATGTCCAACGAC   | 138                |
| <i>PLDZETA1</i>                                | Forward: TCGGAAGTCAGCAAGCCATT<br>Reverse: TGCTTACCATCACGTAGCC   | 184                |
| Cytochrome P450                                |                                                                 |                    |
| <i>CYP75B2</i>                                 | Forward: TTCGTTCCGTTGCTAGAGCC<br>Reverse: TCGCCTTGATCCTCCAAC    | 112                |
| <i>CYP81E1</i>                                 | Forward: TGATCAAGCTGGCCGAGAAG<br>Reverse: AACTCGGGGTCTGTCTCCT   | 149                |
| <b>Plant growth (6)</b>                        |                                                                 |                    |
| <i>CYP96A15</i>                                | Forward: AAGAGCTTGGGACACCTTCG<br>Reverse: ATTGTTTCGGTCAGCCCTGT  | 148                |
| <i>EMS1</i>                                    | Forward: TCCTCAAGACCCTCTCCTCG<br>Reverse: GCTATCCTCATTCGCCTGCT  | 184                |
| <i>GEM</i>                                     | Forward: ATCAGCAAGGAACGAAGGT<br>Reverse: CGTTCCAGCTATGGGTCCAG   | 141                |
| <i>MIZ1</i>                                    | Forward: GGAATGGGGTTGGTTCGGAT<br>Reverse: AACCCCGTACCCTGACTTCT  | 120                |
| <i>SBT1.1</i>                                  | Forward: CATGTACGCTGCAATGTCCG<br>Reverse: CGTCTTCGATAGGGGAGTGC  | 164                |
| <i>ZOG1</i>                                    | Forward: CTAACGCCGAGTCCTACACC<br>Reverse: CCTTCAAGCGAAGGGATGGT  | 121                |
| <b>Stress response (12)</b>                    |                                                                 |                    |
| Heat shock protein and cold responsive protein |                                                                 |                    |
| <i>HSP70</i>                                   | Forward: GACGACGCCTTCTTACGTGG<br>Reverse: ATCGAAGACGGTGTTGACGG  | 100                |
| <i>HSC-1</i>                                   | Forward: GCTACCTCCAGCCGACAAAA<br>Reverse: TCCATCGAACCACCATCAGC  | 186                |
| <i>HSC-2</i>                                   | Forward: CCAATGGCTTGATGGCAACC<br>Reverse: AACTTCATCGTCCATCGGGG  | 145                |
| <i>COR413IM1</i>                               | Forward: TGACCACCAGCGAGAAGAAG<br>Reverse: TTGCAGTCCCCTTGGTAGC   | 168                |

|                      |                                                                |     |
|----------------------|----------------------------------------------------------------|-----|
| <i>CRPK1</i>         | Forward: TGTAGCTAGAGGGCTCGCAT<br>Reverse: CTGGAATCAACTTGGCCAGC | 140 |
| <i>BAP1</i>          | Forward: GAAGTCCACGAGAGCGGATT<br>Reverse: CGGGTGTGTAGTCTCCCAAG | 188 |
| Transcription factor |                                                                |     |
| <i>ERF5</i>          | Forward: GGTGACGGAGAGGAGACACT<br>Reverse: ATCAACCGCCGTGTCATAGG | 127 |
| <i>ERF020</i>        | Forward: ACGACTCTGGCTCGGTACTT<br>Reverse: AAGGCAGCATCAGAGGGAAG | 122 |
| <i>MYB4</i>          | Forward: CGTGAAACTTGGCGGCTACT<br>Reverse: GATGGGTGTGCCAGTGATTC | 143 |
| <i>MYB14</i>         | Forward: TCCTCAGCCACATGACACAG<br>Reverse: GAGTCCGCGTTTTCGCTTAC | 192 |
| <i>NAC071</i>        | Forward: AACGGGACATGGAGTGGTTC<br>Reverse: GTAGCCTTCCAGTACCCAGC | 100 |
| <i>WRKY24</i>        | Forward: CAATGAAGCGCCACGAAGAG<br>Reverse: GTCCTCTGACCTCTCGACT  | 179 |

**Table S2:** Summary of sequencing data of *H. perforatum* transcriptome

|                                            | 15°C   | 22°C  |
|--------------------------------------------|--------|-------|
| <b>Unfiltered data</b>                     |        |       |
| Data of reads number (million)             | 39.44  | 45.60 |
| Reads length                               | 150    | 150   |
| GC (%)                                     | 51.40  | 51.30 |
| Data of reads number×read length (million) | 5,916  | 6,840 |
| Q20(%)                                     | 96.97  | 97.68 |
| Q30(%)                                     | 92.26  | 93.50 |
| <b>Filtered data<sup>1</sup></b>           |        |       |
| Data of reads number (million)             | 39.36  | 45.54 |
| Data of reads number×read length (million) | 5,879  | 6,802 |
| GC (%)                                     | 51.38  | 51.29 |
| Q20(%)                                     | 97.06  | 97.75 |
| Q30(%)                                     | 92.38  | 93.59 |
| <b>Mapped data<sup>2</sup></b>             |        |       |
| Data of unique mapped reads (million)      | 28.60  | 33.37 |
| Data of multiple mapped reads (million)    | 2.48   | 2.90  |
| Mapping ratio (%)                          | 78.96  | 79.64 |
| <b>Compiled data</b>                       |        |       |
| Total number of unigenes                   | 44,776 |       |
| Total Length (bp) (million)                | 44.86  |       |
| N50 (bp)                                   | 1,694  |       |
| Max length (bp)                            | 15,636 |       |
| Min length (bp)                            | 201    |       |
| Average Length (bp)                        | 1,001  |       |
| GC content (%)                             | 46.00  |       |

<sup>1</sup> Reads with a quality score < 30 and length < 60 bp were excluded;

<sup>2</sup> Mapping ratio = (Unique mapped reads + Multiple mapped reads) / Filtered reads

**Table S3:** Database searches for collected *H. perforatum* nucleotide sequences

| BLASTx searching against specific platforms | Values | Percentage (%) |
|---------------------------------------------|--------|----------------|
| NR                                          | 29,475 | 65.83          |
| SwissProt                                   | 19,384 | 43.29          |
| KOG                                         | 16,057 | 35.86          |
| KEGG                                        | 27,680 | 61.82          |
| GO                                          | 12,038 | 26.88          |

**Table S4:** Photosynthesis genes differentially expressed at 15 versus 22°C

| Gene name      | Protein name                                                       | log <sup>2</sup> Ratio (15°C <sub>RPKM</sub> /22°C <sub>RPKM</sub> ) |
|----------------|--------------------------------------------------------------------|----------------------------------------------------------------------|
| <i>CAB1</i>    | Chlorophyll a-b binding of LHCII type 1 protein                    | 1.18                                                                 |
| <i>CAB1B</i>   | Chlorophyll a-b binding protein 1B, chloroplastic                  | 1.26                                                                 |
| <i>CAB3</i>    | Chlorophyll a-b binding protein 3, chloroplastic                   | 1.13                                                                 |
| <i>CAB3C</i>   | Chlorophyll a-b binding protein 3C, chloroplastic                  | 1.46                                                                 |
| <i>CAB96</i>   | Chlorophyll a-b binding protein AB96                               | 1.16                                                                 |
| <i>CAB</i>     | Chlorophyll a-b binding protein, chloroplastic                     | 1.42                                                                 |
| <i>ELI_PEA</i> | Early light-induced protein, chloroplastic                         | 1.97                                                                 |
| <i>ELIP2</i>   | Early light-induced protein 2, chloroplastic                       | -1.80                                                                |
| <i>OHP2</i>    | Light-harvesting complex-like protein OHP2, chloroplastic          | 1.60                                                                 |
| <i>RBCS-C</i>  | Ribulose biphosphate carboxylase small chain C, chloroplastic      | 1.45                                                                 |
| <i>RCA</i>     | Ribulose biphosphate carboxylase/oxygenase activase, chloroplastic | -1.23                                                                |
| <i>RBCS-8B</i> | Ribulose biphosphate carboxylase small chain 8B, chloroplastic     | -2.69                                                                |

**Table S5:** Carbohydrate metabolism genes differentially expressed at 15 versus 22°C

| Gene name      | Protein name                                         | log <sup>2</sup> Ratio (15°C <sub>RPKM</sub> /22°C <sub>RPKM</sub> ) |
|----------------|------------------------------------------------------|----------------------------------------------------------------------|
| <i>CA</i>      | Carbonic anhydrase, chloroplastic                    | 1.43                                                                 |
| <i>CA1</i>     | Carbonic anhydrase 1                                 | 1.23                                                                 |
| <i>LDHA</i>    | L-lactate dehydrogenase A                            | 2.47                                                                 |
| <i>PGAM</i>    | Phosphoglycerate mutase-like protein                 | 1.31                                                                 |
| <i>AGLU2</i>   | Alpha-glucosidase 2                                  | 1.16                                                                 |
| <i>BGLU11</i>  | Beta-glucosidase 11                                  | 1.38                                                                 |
| <i>GINT1</i>   | Glucosamine inositolphosphorylceramide transferase 1 | -1.18                                                                |
| <i>GAD</i>     | Glutamate decarboxylase                              | 1.15                                                                 |
| <i>GAPC</i>    | Glyceraldehyde-3-phosphate dehydrogenase, cytosolic  | 1.84                                                                 |
| <i>NonBGLU</i> | Non-cyanogenic beta-glucosidase                      | 1.08                                                                 |
| <i>TOGT1</i>   | Scopoletin glucosyltransferase                       | 1.14                                                                 |
| <i>GAE6</i>    | UDP-glucuronate 4-epimerase 6                        | -1.33                                                                |
| <i>USP1</i>    | UDP-sugar pyrophosphorylase 1                        | -1.30                                                                |



**Table S6: Fatty acids metabolism genes differentially expressed at 15 versus 22°C**

| Gene name        | Protein name                                                         | log <sup>2</sup> Ratio (15°C <sub>RPKM</sub> /22°C <sub>RPKM</sub> ) |
|------------------|----------------------------------------------------------------------|----------------------------------------------------------------------|
| <i>FAD3</i>      | Acyl-lipid omega-3 desaturase (cytochrome b5), endoplasmic reticulum | 1.04                                                                 |
| <i>YLR118C</i>   | Acyl-protein thioesterase 1                                          | 1.59                                                                 |
| <i>abhd17c</i>   | Alpha/beta hydrolase domain-containing protein 17C                   | -1.29                                                                |
| <i>HOS3</i>      | Elongation of fatty acids protein 3-like                             | 1.81                                                                 |
| <i>FAR3</i>      | Fatty acyl-CoA reductase 3                                           | -1.11                                                                |
| <i>MGD3</i>      | Monogalactosyldiacylglycerol synthase 3, chloroplastic               | 1.22                                                                 |
| <i>At1g06800</i> | Phospholipase A1-Igamma1, chloroplastic                              | 2.41                                                                 |
| <i>At4g16820</i> | Phospholipase A1-Ibeta2, chloroplastic                               | 1.87                                                                 |
| <i>PLDZETA1</i>  | Phospholipase D zeta 1                                               | 1.69                                                                 |
| <i>PLD1</i>      | Phospholipase D alpha 1                                              | 1.27                                                                 |
| <i>SQD2</i>      | Sulfoquinovosyl transferase SQD2                                     | 1.11                                                                 |
| <i>LIP2</i>      | Triacylglycerol lipase 2                                             | -1.11                                                                |
| <i>BEAT</i>      | Acetyl-CoA-benzylalcohol acetyltransferase                           | 1.45                                                                 |
| <i>BPS</i>       | 2,4,6-trihydroxybenzophenone synthase                                | 1.74                                                                 |
| <i>PED1</i>      | 3-ketoacyl-CoA thiolase 2, peroxisomal                               | 1.04                                                                 |

**Table S7: Cytochrome P450 genes differentially expressed at 15 versus 22°C**

| Gene name        | Protein name               | log <sup>2</sup> Ratio (15°C <sub>RPKM</sub> /22°C <sub>RPKM</sub> ) |
|------------------|----------------------------|----------------------------------------------------------------------|
| <i>CYP71A6</i>   | Cytochrome P450 71A6       | 0.08                                                                 |
| <i>CYP71A9</i>   | Cytochrome P450 71A9       | 1.59                                                                 |
| <i>CYP78A5</i>   | Cytochrome P450 78A5       | -2.31                                                                |
| <i>CYP82A1</i>   | Cytochrome P450 82A1       | 2.17                                                                 |
| <i>CYP82A3</i>   | Cytochrome P450 82A3       | -1.41                                                                |
| <i>CYP89A9</i>   | Cytochrome P450 89A9       | 1.94                                                                 |
| <i>CYP86B1</i>   | Cytochrome P450 86B1       | 2.82                                                                 |
| <i>CYP90B1</i>   | Cytochrome P450 90B1       | -1.11                                                                |
| <i>CYP94B1</i>   | Cytochrome P450 94B1       | 1.79                                                                 |
| <i>CYP96A15</i>  | Alkane hydroxylase MAH1    | 1.37                                                                 |
| <i>CYP714C2</i>  | Cytochrome P450 714C2      | 1.22                                                                 |
| <i>CYP81D1</i>   | Cytochrome P450 81D1       | 1.86                                                                 |
| <i>CYP81E8</i>   | Cytochrome P450 81E8       | 0.53                                                                 |
| <i>CYP716B1</i>  | Cytochrome P450 716B1      | 1.22                                                                 |
| <i>CYP736A12</i> | Cytochrome P450 CYP736A12  | 1.04                                                                 |
| <i>CYP749A22</i> | Cytochrome P450 CYP749A22  | -1.33                                                                |
| <i>CYP82D47</i>  | Cytochrome P450 CYP82D47   | 1.80                                                                 |
| <i>CYP75B2</i>   | Flavonoid 3'-monooxygenase | 1.19                                                                 |
| <i>CYP93B1</i>   | Licodione synthase         | 1.50                                                                 |
| <i>CYP81E9</i>   | Isoflavone 3'-hydroxylase  | 4.31                                                                 |

**Table S8:** Morpho-physiological traits genes differentially expressed at 15 versus 22 °C

| Gene name       | Protein name                                     | log <sup>2</sup> Ratio (15 °C <sub>RPKM</sub> /22 °C <sub>RPKM</sub> ) |
|-----------------|--------------------------------------------------|------------------------------------------------------------------------|
| <i>ZOG1</i>     | Zeatin O-glucosyltransferase                     | -1.29                                                                  |
| <i>DCR</i>      | BAHD acyltransferase DCR                         | -1.33                                                                  |
| <i>CYP96A15</i> | Alkane hydroxylase MAH1                          | 1.37                                                                   |
| <i>MIZ1</i>     | Protein MIZU-KUSSEI 1                            | -0.09                                                                  |
| <i>GEM</i>      | GLABRA2 expression modulator                     | -1.02                                                                  |
| <i>CET1</i>     | CEN-like protein 1                               | 1.54                                                                   |
| <i>FPF1</i>     | Flowering-promoting factor 1                     | -3.26                                                                  |
| <i>FTIP1</i>    | FT-interacting protein 1                         | 1.47                                                                   |
| <i>HD3B</i>     | Protein HEADING DATE 3B                          | -1.25                                                                  |
| <i>SWC6</i>     | SWR1 complex subunit 6                           | -1.23                                                                  |
| <i>SBT1.9</i>   | Subtilisin-like protease SBT1.9                  | 1.07                                                                   |
| <i>SBT3.18</i>  | Subtilisin-like protease SBT3.18                 | 2.69                                                                   |
| <i>SBT11.1</i>  | Subtilisin-like protease SBT1.1                  | 2.17                                                                   |
| <i>EMS1</i>     | Leucine-rich repeat receptor protein kinase EMS1 | 2.19                                                                   |
| <i>MSP1</i>     | Leucine-rich repeat receptor protein kinase MSP1 | 1.04                                                                   |

**Table S9:** Heat shock protein and cold responsive protein genes differentially expressed at 15 versus 22 °C

| Gene name        | Protein name                             | log <sup>2</sup> Ratio (15 °C <sub>RPKM</sub> /22 °C <sub>RPKM</sub> ) |
|------------------|------------------------------------------|------------------------------------------------------------------------|
| <i>HSP15.7</i>   | 15.7 kDa heat shock protein, peroxisomal | -2.39                                                                  |
| <i>HSP17.3-B</i> | 17.3 kDa class I heat shock protein      | -1.60                                                                  |
| <i>HSP17.4B</i>  | 17.4 kDa class III heat shock protein    | -2.99                                                                  |
| <i>HSP17.9-D</i> | 17.9 kDa class II heat shock protein     | -2.60                                                                  |
| <i>HSP18.2</i>   | 18.2 kDa class I heat shock protein      | -1.61                                                                  |
| <i>HSP22.0</i>   | 22.0 kDa class IV heat shock protein     | -1.83                                                                  |
| <i>HSP70-8</i>   | Heat shock 70 kDa protein 8              | -1.15                                                                  |
| <i>HSP70</i>     | Heat shock cognate 70 kDa protein        | -1.64                                                                  |
| <i>HSC-I</i>     | Heat shock cognate 70 kDa protein 1      | -3.68                                                                  |
| <i>HSC-2</i>     | Heat shock cognate 70 kDa protein 2      | -3.33                                                                  |
| <i>HSF30</i>     | Heat shock factor protein HSF30          | -1.76                                                                  |
| <i>HSP81-1</i>   | Heat shock protein 81-1                  | -1.02                                                                  |
| <i>HSP83A</i>    | Heat shock protein 83                    | -2.73                                                                  |
| <i>HSP21</i>     | Small heat shock protein, chloroplastic  | -2.69                                                                  |
| <i>HSA32</i>     | Protein HEAT-STRESS-ASSOCIATED 32        | -1.57                                                                  |
| <i>BAP1</i>      | BON1-associated protein 1                | 1.43                                                                   |

|                  |                                                            |      |
|------------------|------------------------------------------------------------|------|
| <i>COR413IM1</i> | Cold-regulated 413 inner membrane protein 1, chloroplastic | 1.29 |
| <i>CRPK1</i>     | Cold-responsive protein kinase 1                           | 1.22 |

**Table S10:** Transcription factors differentially expressed at 15 versus 22°C

| Gene name                              | Protein name                          | log <sup>2</sup> Ratio (15°C <sub>RPKM</sub> /22°C <sub>RPKM</sub> ) |
|----------------------------------------|---------------------------------------|----------------------------------------------------------------------|
| <b>Myb family transcription factor</b> |                                       |                                                                      |
| <i>PHL5</i>                            | Myb family transcription factor PHL5  | -1.27                                                                |
| <i>MYB2</i>                            | Transcription factor MYB2             | -3.01                                                                |
| <i>MYB3</i>                            | Transcription factor MYB3             | -1.05                                                                |
| <i>MYB4</i>                            | Transcription factor MYB4             | 2.48                                                                 |
| <i>MYB14</i>                           | Transcription factor MYB14            | 1.40                                                                 |
| <i>MYB17</i>                           | Transcription factor MYB17            | 1.82                                                                 |
| <i>MYB48</i>                           | Transcription factor MYB48            | 10.44                                                                |
| <i>MYB52</i>                           | Transcription factor MYB52            | -1.02                                                                |
| <i>MYB62</i>                           | Transcription factor MYB62            | -1.36                                                                |
| <i>MYB73</i>                           | Transcription factor MYB73            | -1.08                                                                |
| <i>MYB78</i>                           | Transcription factor MYB78            | 1.53                                                                 |
| <i>MYB108</i>                          | Transcription factor MYB108           | 1.15                                                                 |
| <b>MADS-box transcription factor</b>   |                                       |                                                                      |
| <i>AGL80</i>                           | Agamous-like MADS-box protein AGL80   | -1.32                                                                |
| <i>SVP</i>                             | MADS-box protein SVP                  | -1.26                                                                |
| <i>CMB1</i>                            | MADS-box protein CMB1                 | -2.85                                                                |
| <i>MADS50</i>                          | MADS-box transcription factor 50      | -2.09                                                                |
| <b>Transcription factor bHLHs</b>      |                                       |                                                                      |
| <i>BHLH62</i>                          | Transcription factor bHLH62           | -1.10                                                                |
| <i>BHLH92</i>                          | Transcription factor bHLH92           | 1.11                                                                 |
| <i>BHLH96</i>                          | Transcription factor bHLH96           | -1.30                                                                |
| <i>BHLH154</i>                         | Transcription factor bHLH154          | -1.35                                                                |
| <i>BHLH162</i>                         | Transcription factor bHLH162          | 2.64                                                                 |
| <b>Transcription factor TCPs</b>       |                                       |                                                                      |
| <i>TCP1</i>                            | Transcription factor TCP1             | -1.60                                                                |
| <i>TCP12</i>                           | Transcription factor TCP12            | -2.00                                                                |
| <i>TCP20</i>                           | Transcription factor TCP20            | -1.00                                                                |
| <b>WRKY transcription factor</b>       |                                       |                                                                      |
| <i>WRKY7</i>                           | Probable WRKY transcription factor 7  | 1.56                                                                 |
| <i>WRKY40</i>                          | Probable WRKY transcription factor 40 | 2.16                                                                 |
| <i>WRKY41</i>                          | Probable WRKY transcription factor 41 | 2.18                                                                 |
| <i>WRKY53</i>                          | Probable WRKY transcription factor 53 | 3.02                                                                 |
| <i>WRKY72</i>                          | Probable WRKY transcription factor 72 | 1.53                                                                 |
| <i>WRKY6</i>                           | WRKY transcription factor 6           | 1.11                                                                 |
| <i>WRKY28</i>                          | WRKY transcription factor 28          | 1.75                                                                 |
| <i>WRKY55</i>                          | WRKY transcription factor 55          | 2.83                                                                 |

|                                                 |                                                                    |       |
|-------------------------------------------------|--------------------------------------------------------------------|-------|
| <i>WRKY24</i>                                   | WRKY transcription factor WRKY24                                   | 1.52  |
| <b>bZIP transcription factor</b>                |                                                                    |       |
| <i>BZIP44</i>                                   | bZIP transcription factor 44                                       | -1.12 |
| <i>BZIP61</i>                                   | Basic leucine zipper 61                                            | -1.04 |
| <i>TGA10</i>                                    | bZIP transcription factor TGA10                                    | -1.37 |
| <b>Ethylene-responsive transcription factor</b> |                                                                    |       |
| <i>At1g50680</i>                                | AP2/ERF and B3 domain-containing transcription factor<br>At1g50680 | -0.52 |
| <i>At1g51120</i>                                | AP2/ERF and B3 domain-containing transcription factor<br>At1g51120 | -1.32 |
| <i>ERF2</i>                                     | Ethylene-responsive transcription factor 2                         | 4.72  |
| <i>ERF2</i>                                     | Ethylene-responsive transcription factor 2                         | 1.93  |
| <i>ERF5</i>                                     | Ethylene-responsive transcription factor 5                         | 1.89  |
| <i>ABR1</i>                                     | Ethylene-responsive transcription factor ABR1                      | 1.32  |
| <i>ERF003</i>                                   | Ethylene-responsive transcription factor ERF003                    | -1.34 |
| <i>ERF013</i>                                   | Ethylene-responsive transcription factor ERF013                    | -1.22 |
| <i>ERF017</i>                                   | Ethylene-responsive transcription factor ERF017                    | 3.03  |
| <i>ERF020</i>                                   | Ethylene-responsive transcription factor ERF020                    | 4.50  |
| <i>ERF071</i>                                   | Ethylene-responsive transcription factor ERF071                    | 3.06  |
| <i>ERF095</i>                                   | Ethylene-responsive transcription factor ERF095                    | 4.00  |
| <i>ERF109</i>                                   | Ethylene-responsive transcription factor ERF109                    | 2.48  |
| <b>NAC domain-containing protein</b>            |                                                                    |       |
| <i>NAC014</i>                                   | NAC domain-containing protein 14                                   | 1.10  |
| <i>NAC043</i>                                   | NAC domain-containing protein 43                                   | -1.16 |
| <i>NAC048</i>                                   | NAC domain-containing protein 48                                   | 2.19  |
| <i>NAC071</i>                                   | NAC domain-containing protein 71                                   | 2.54  |
| <i>NAC087</i>                                   | NAC domain-containing protein 87                                   | 1.15  |
| <i>NAC090</i>                                   | NAC domain-containing protein 90                                   | 4.53  |
| <i>NAC100</i>                                   | NAC domain-containing protein 100                                  | -0.76 |

---
